# Supplementary material
Source: Springer Nature journal article supplement (https://www.springermedizin.de/resource/supplementary/12888_2014_1669_MOESM3_ESM.pdf/9481148)
Supplement: MOESM3 [file 9481148]

|                 | Baseline<br>(T0) | Post<br>(T1) | Follow-<br>up (T2) | Follow-<br>up (T3) |
|-----------------|------------------|--------------|--------------------|--------------------|
| BSI*            | X                | X            | X                  | X                  |
| IDS-SR*         | X                | X            | X                  | X                  |
| YMRS*           | X                | X            | X                  | X                  |
| BPDC-<br>47*    | X                | X            | X                  | X                  |
| OQ-45*          | X                | X            | X                  | X                  |
| WHOQol<br>Bref* | X                | X            | X                  | X                  |
| PAI-<br>BOR*    | X                | X            | X                  | X                  |
| PAM*            | X                | X            | X                  | X                  |
| BPDSI***        | X                |              |                    |                    |

Life-Chart\*

one year  
before entry  
(retrospective)  
and during  
entire study  
(prospective)

-12 month

0 month

6 month

12 month

18 month
